# Supplementary material for: Managing genomic diversity in conservation programs of Chinese domestic chickens
Source: PubMed Central journal article supplement (PMC10722821; doi:10.1186/s12711-023-00866-3), 2023-12-14

## CV error

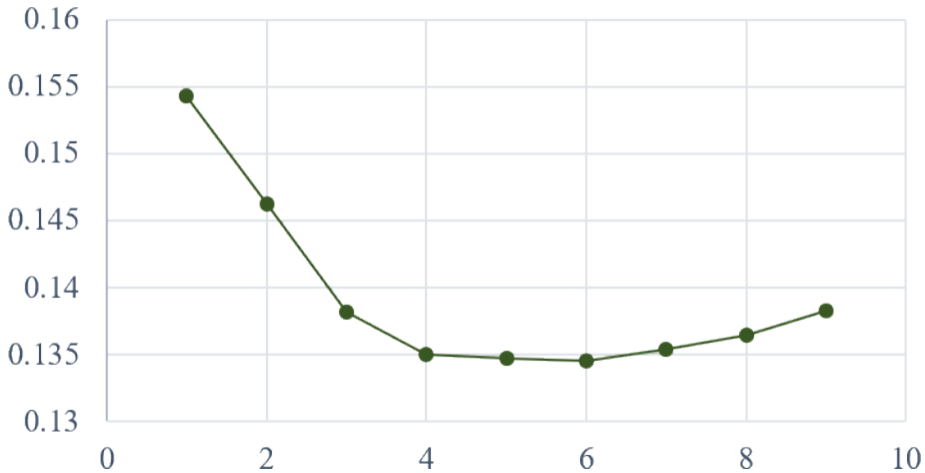

Supplement: 12711_2023_866_MOESM6_ESM.pdf [file 12711_2023_866_MOESM6_ESM.pdf]
