# Supplementary material for: Managing genomic diversity in conservation programs of Chinese domestic chickens
Source: PubMed Central journal article supplement (PMC10722821; doi:10.1186/s12711-023-00866-3), 2023-12-14
Supplement: 12711_2023_866_MOESM12_ESM.pdf [file 12711_2023_866_MOESM12_ESM.pdf]

**(a). BEC\_YBEC**

**FST**

**Pi**

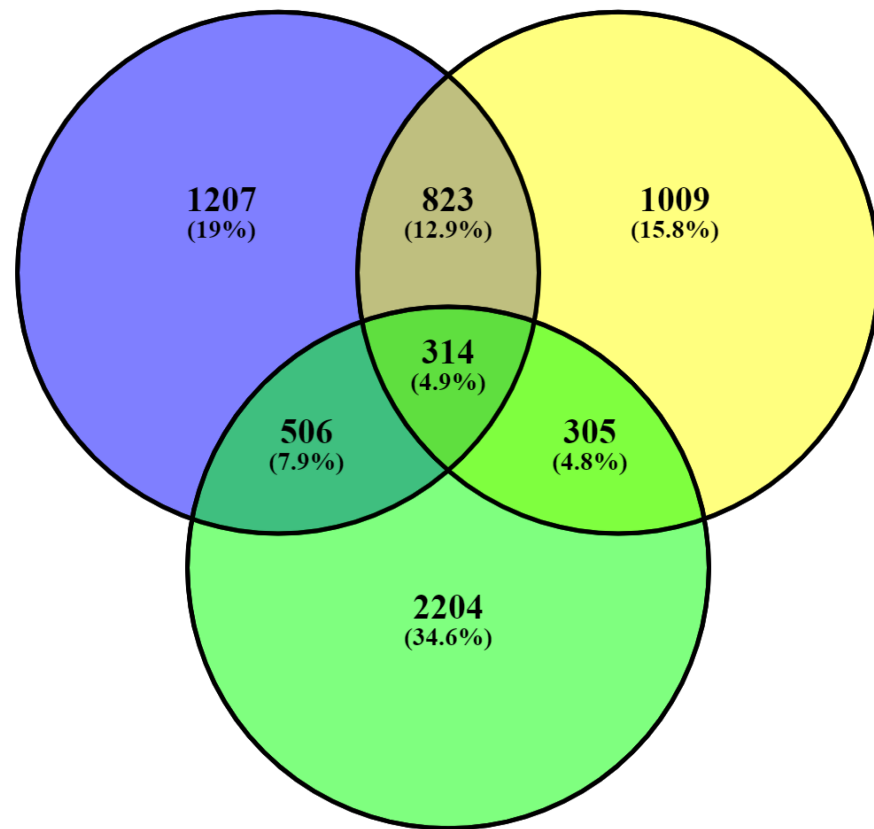

**XP-EHH**

**(b). BYC\_YBYC**

**FST**

**Pi**

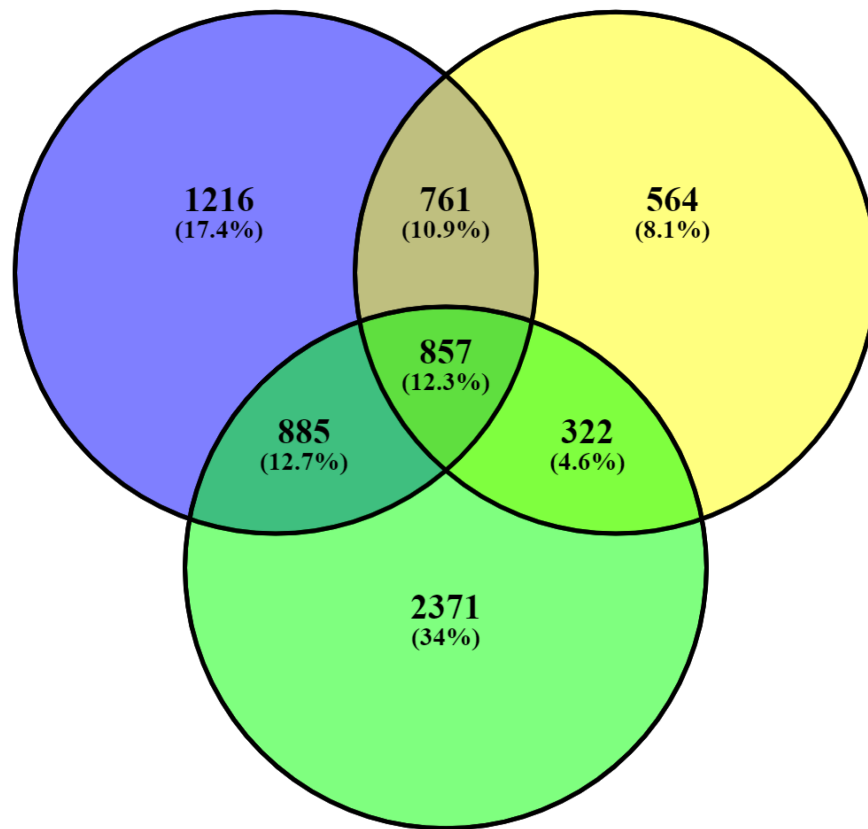

**XP-EHH**

**(c). LSC\_YLSC**

**FST**

**Pi**

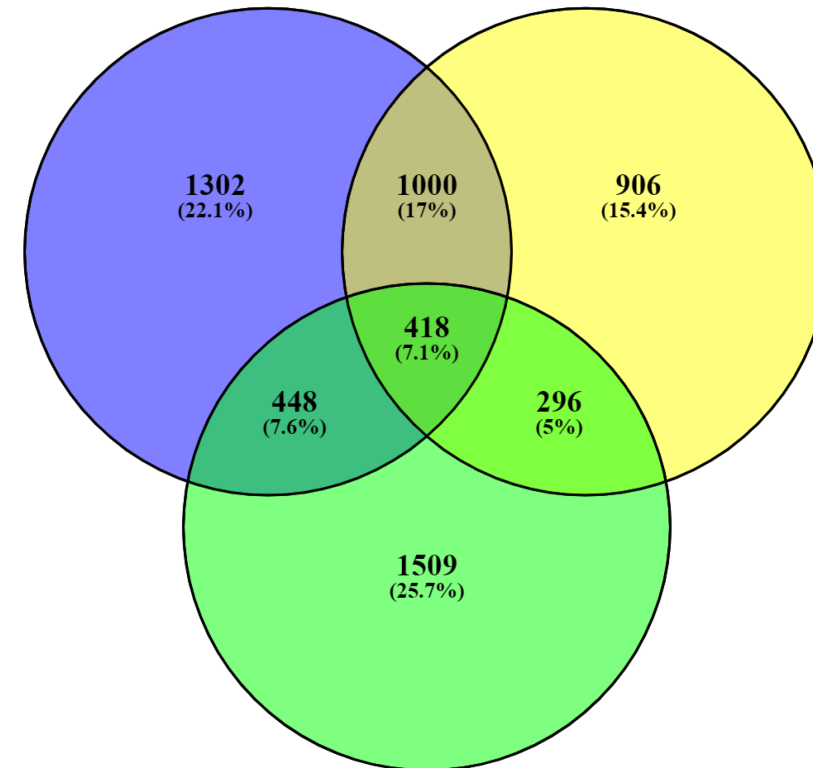

**XP-EHH**
