# Supplementary material for: Managing genomic diversity in conservation programs of Chinese domestic chickens
Source: PubMed Central journal article supplement (PMC10722821; doi:10.1186/s12711-023-00866-3), 2023-12-14

(a).

### Beijing You Chicken

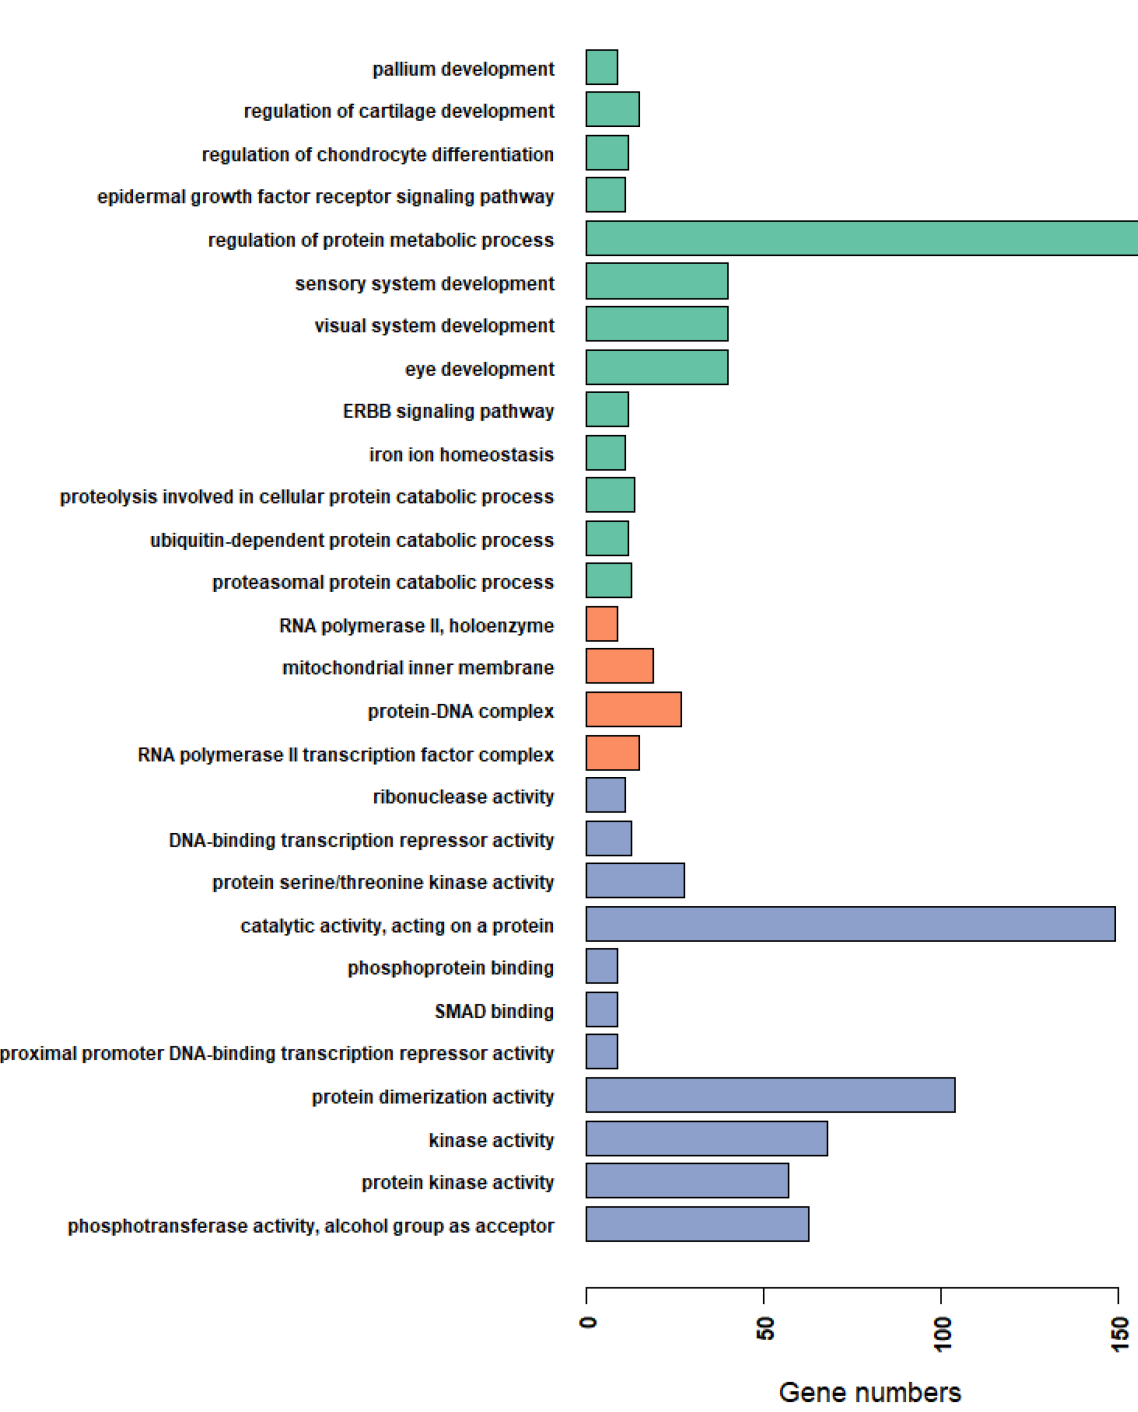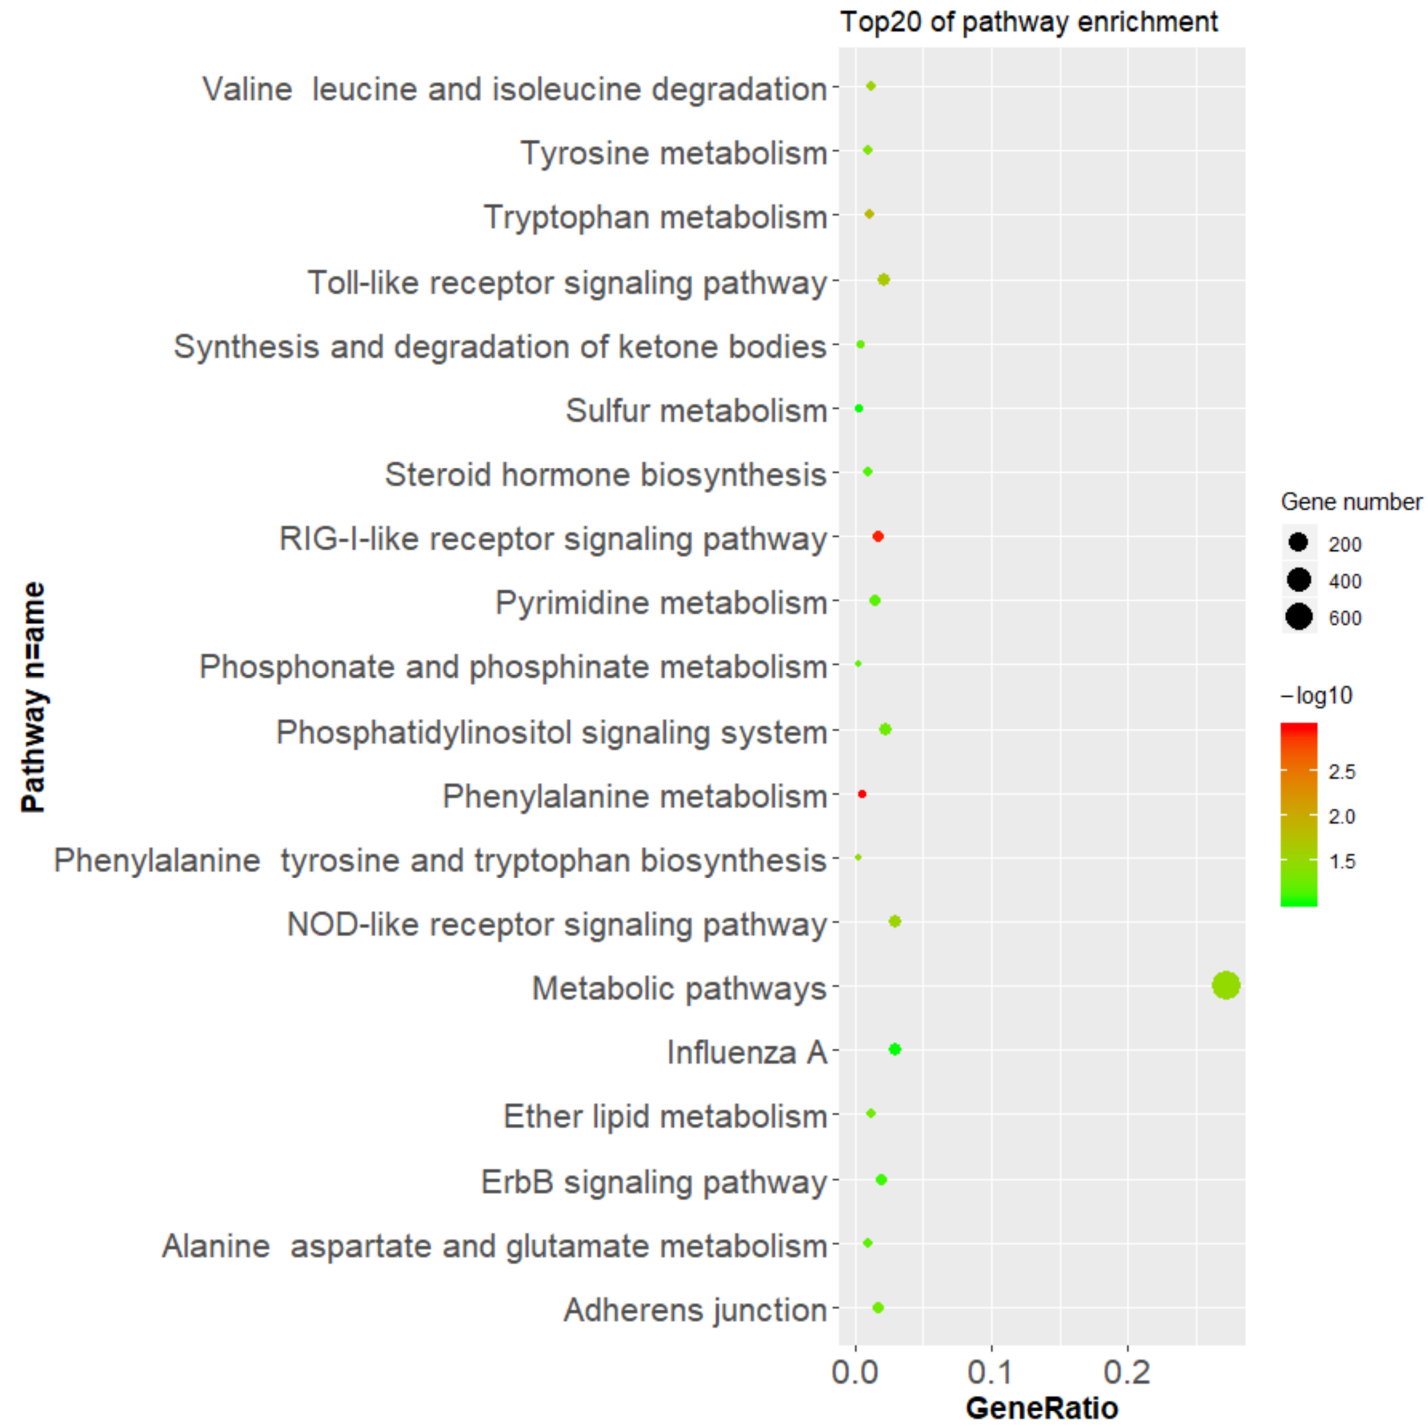

(b).

### Baier Yellow Chicken

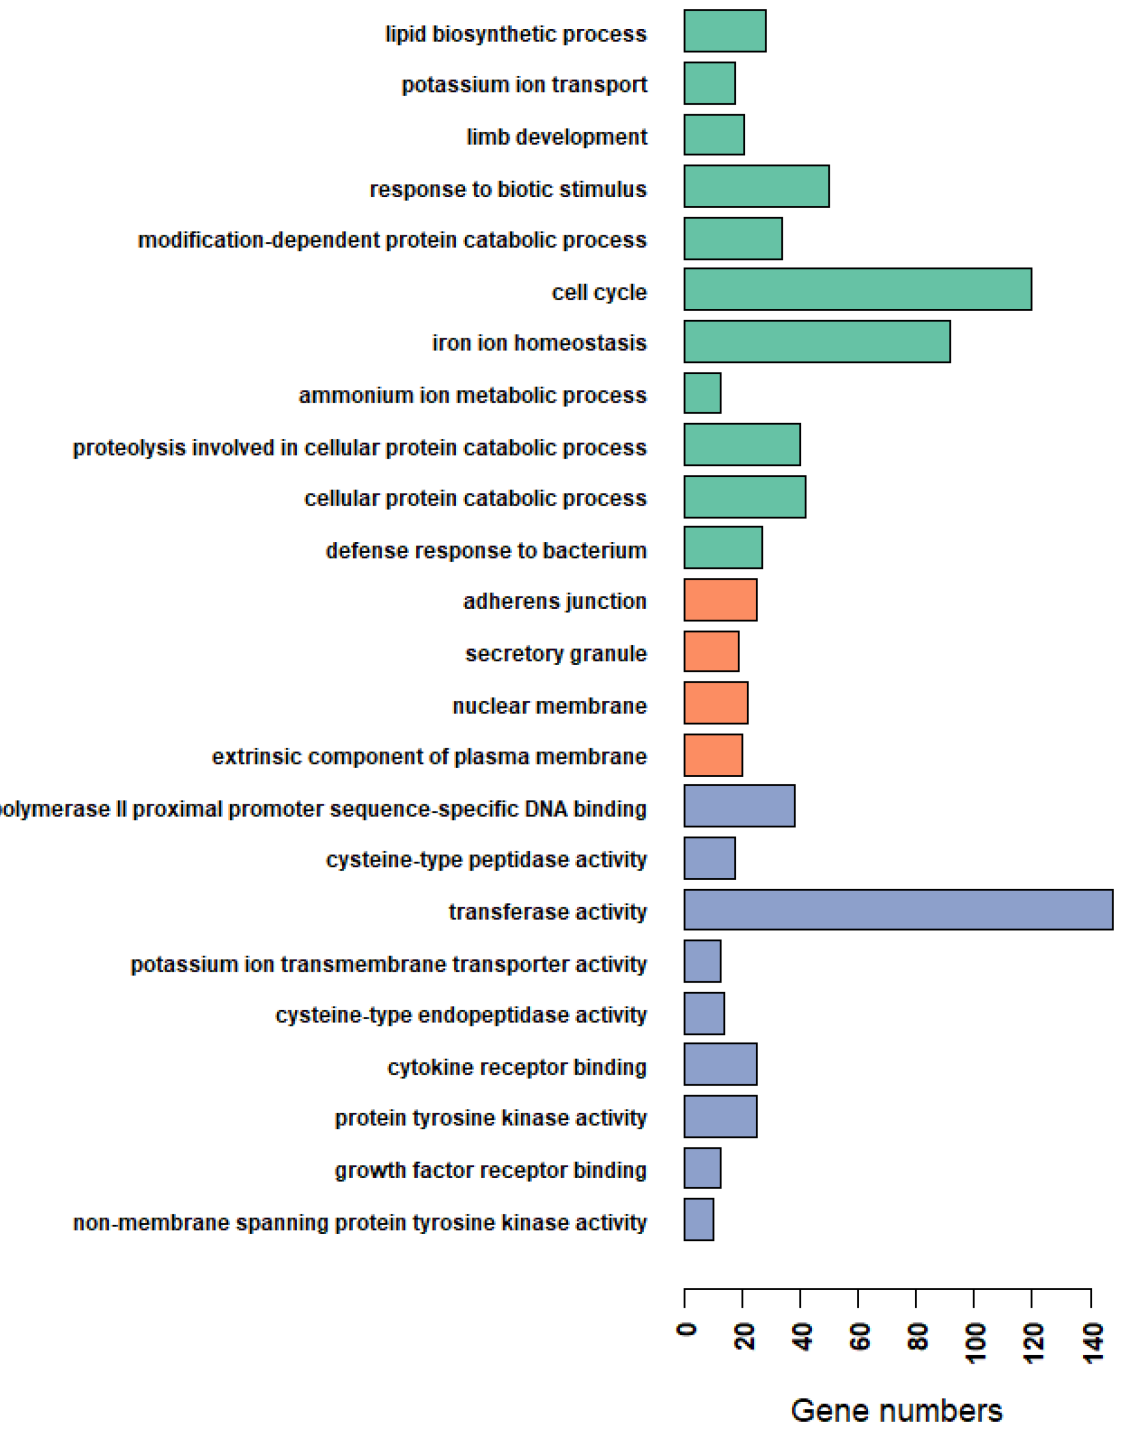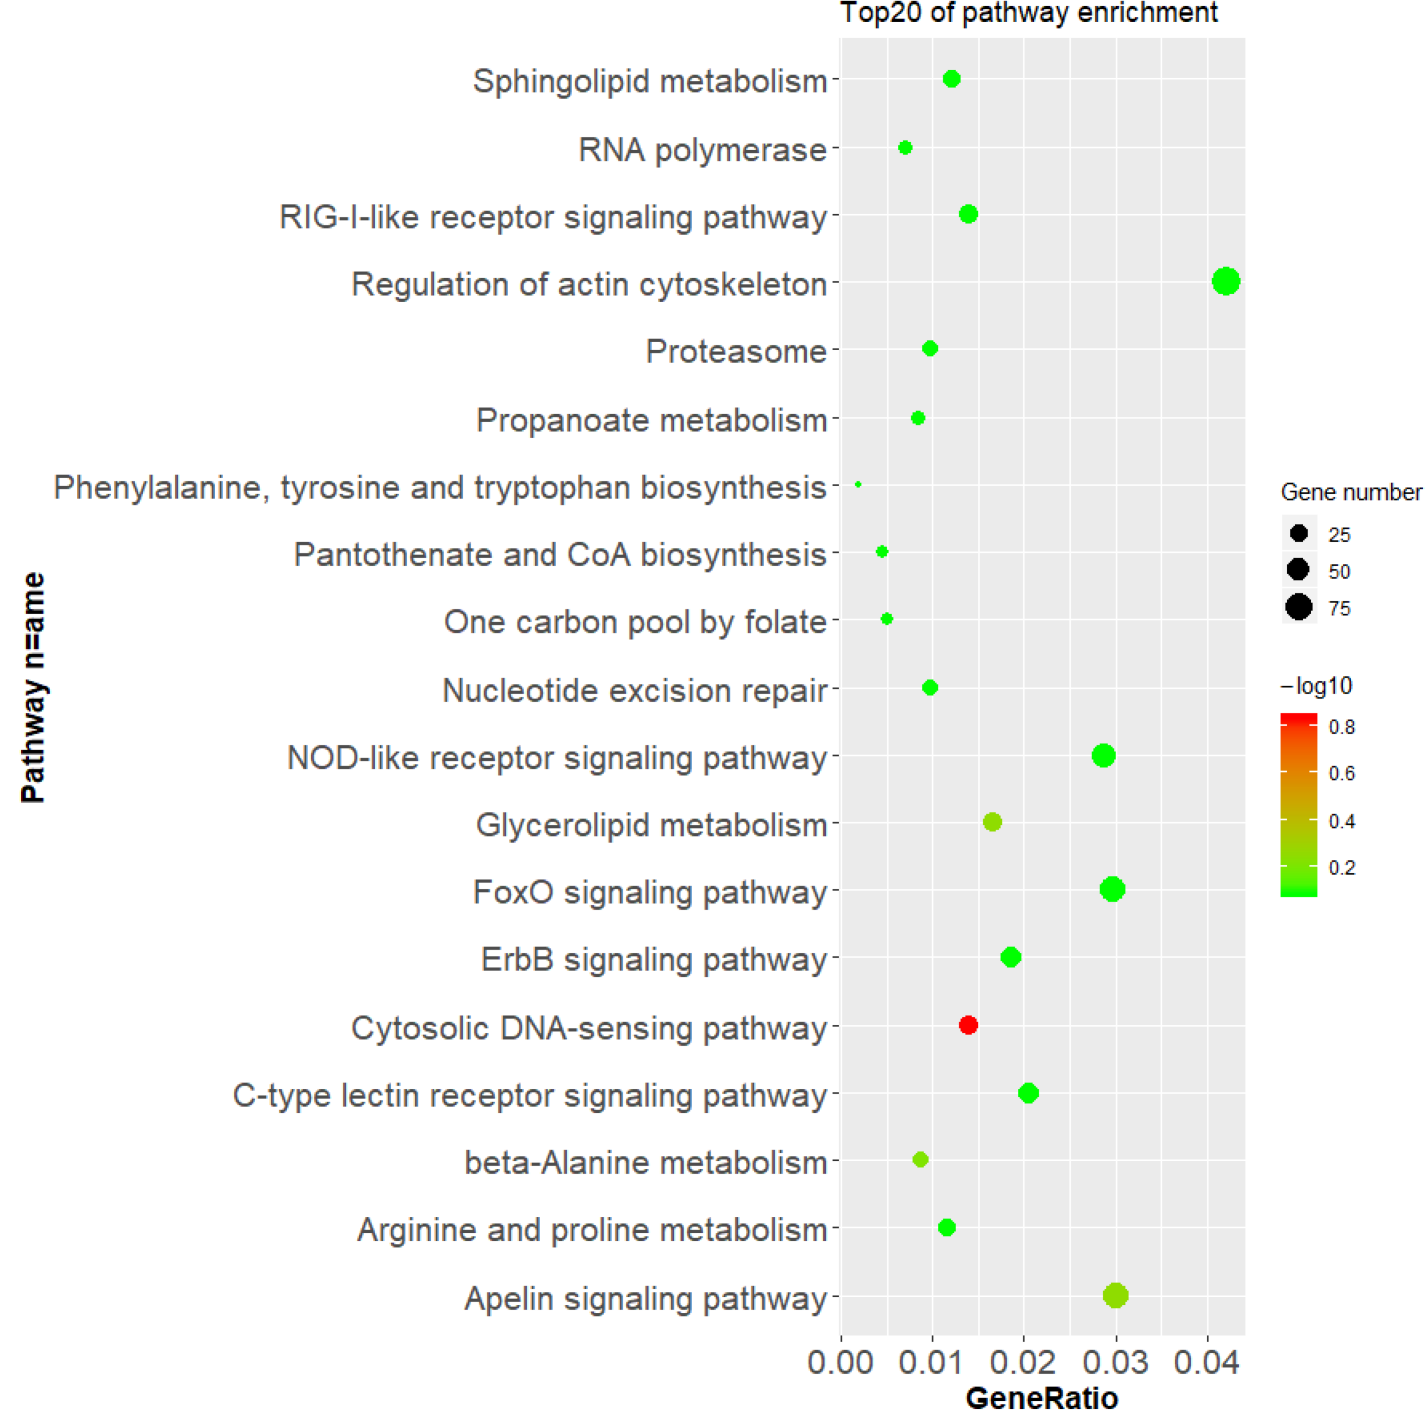

(c).

### Langshan Chicken

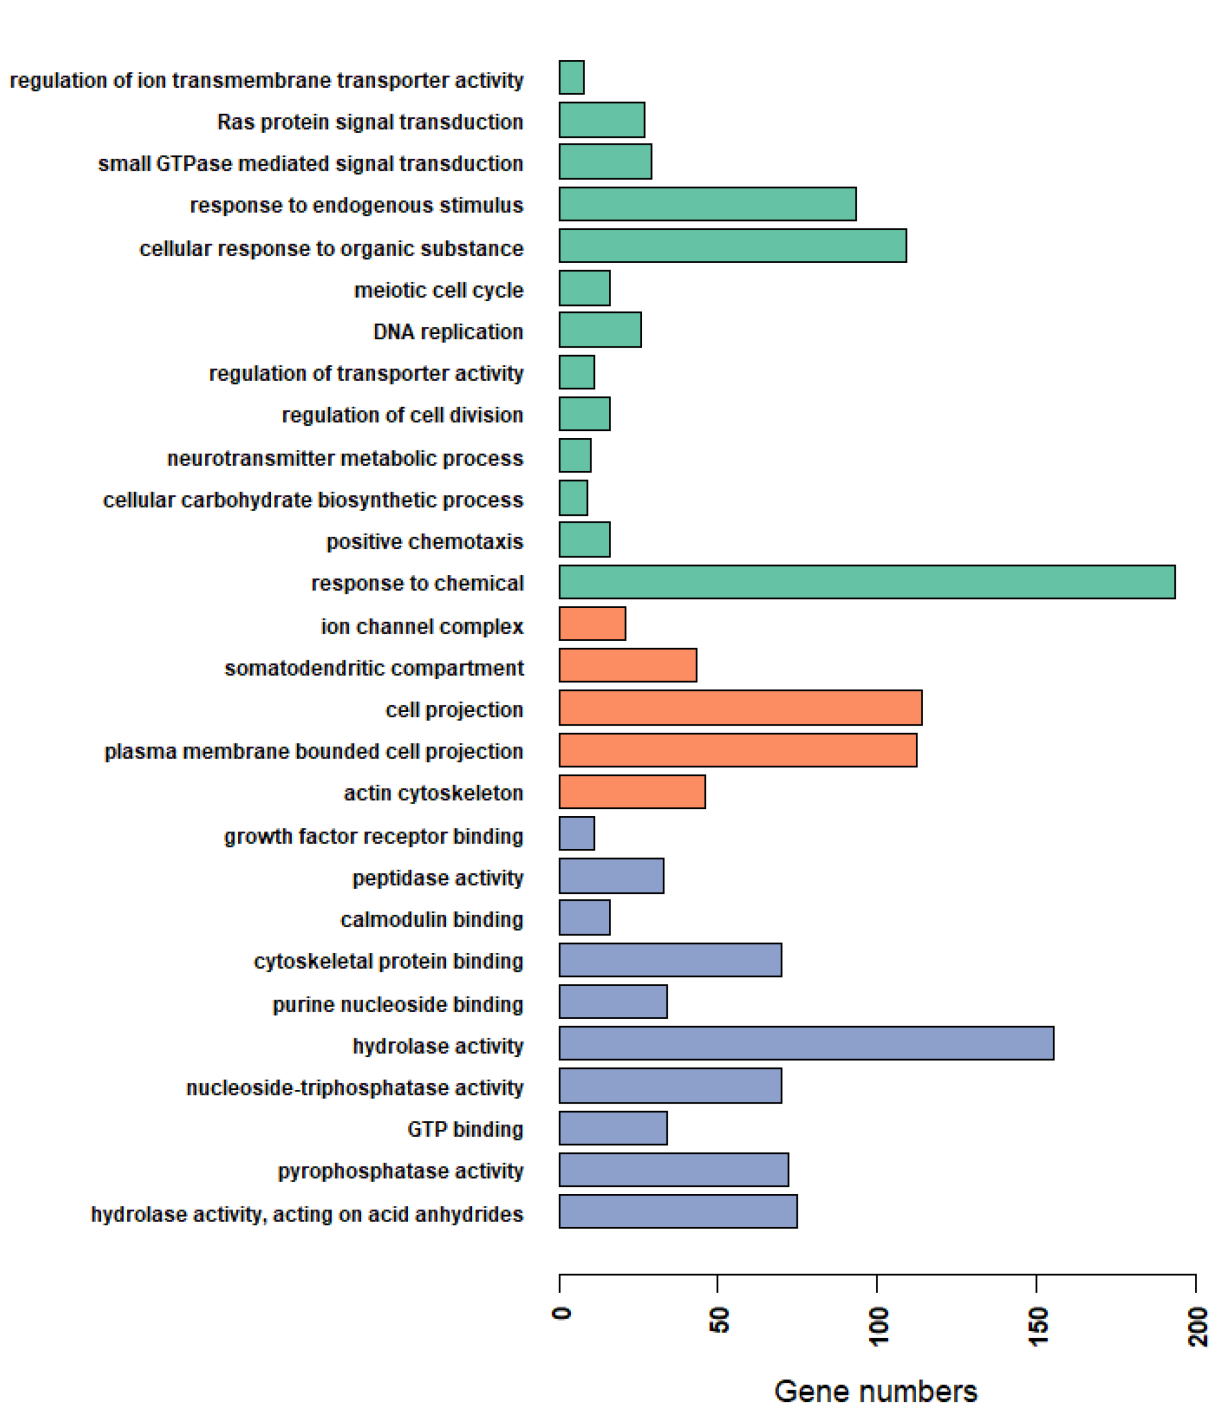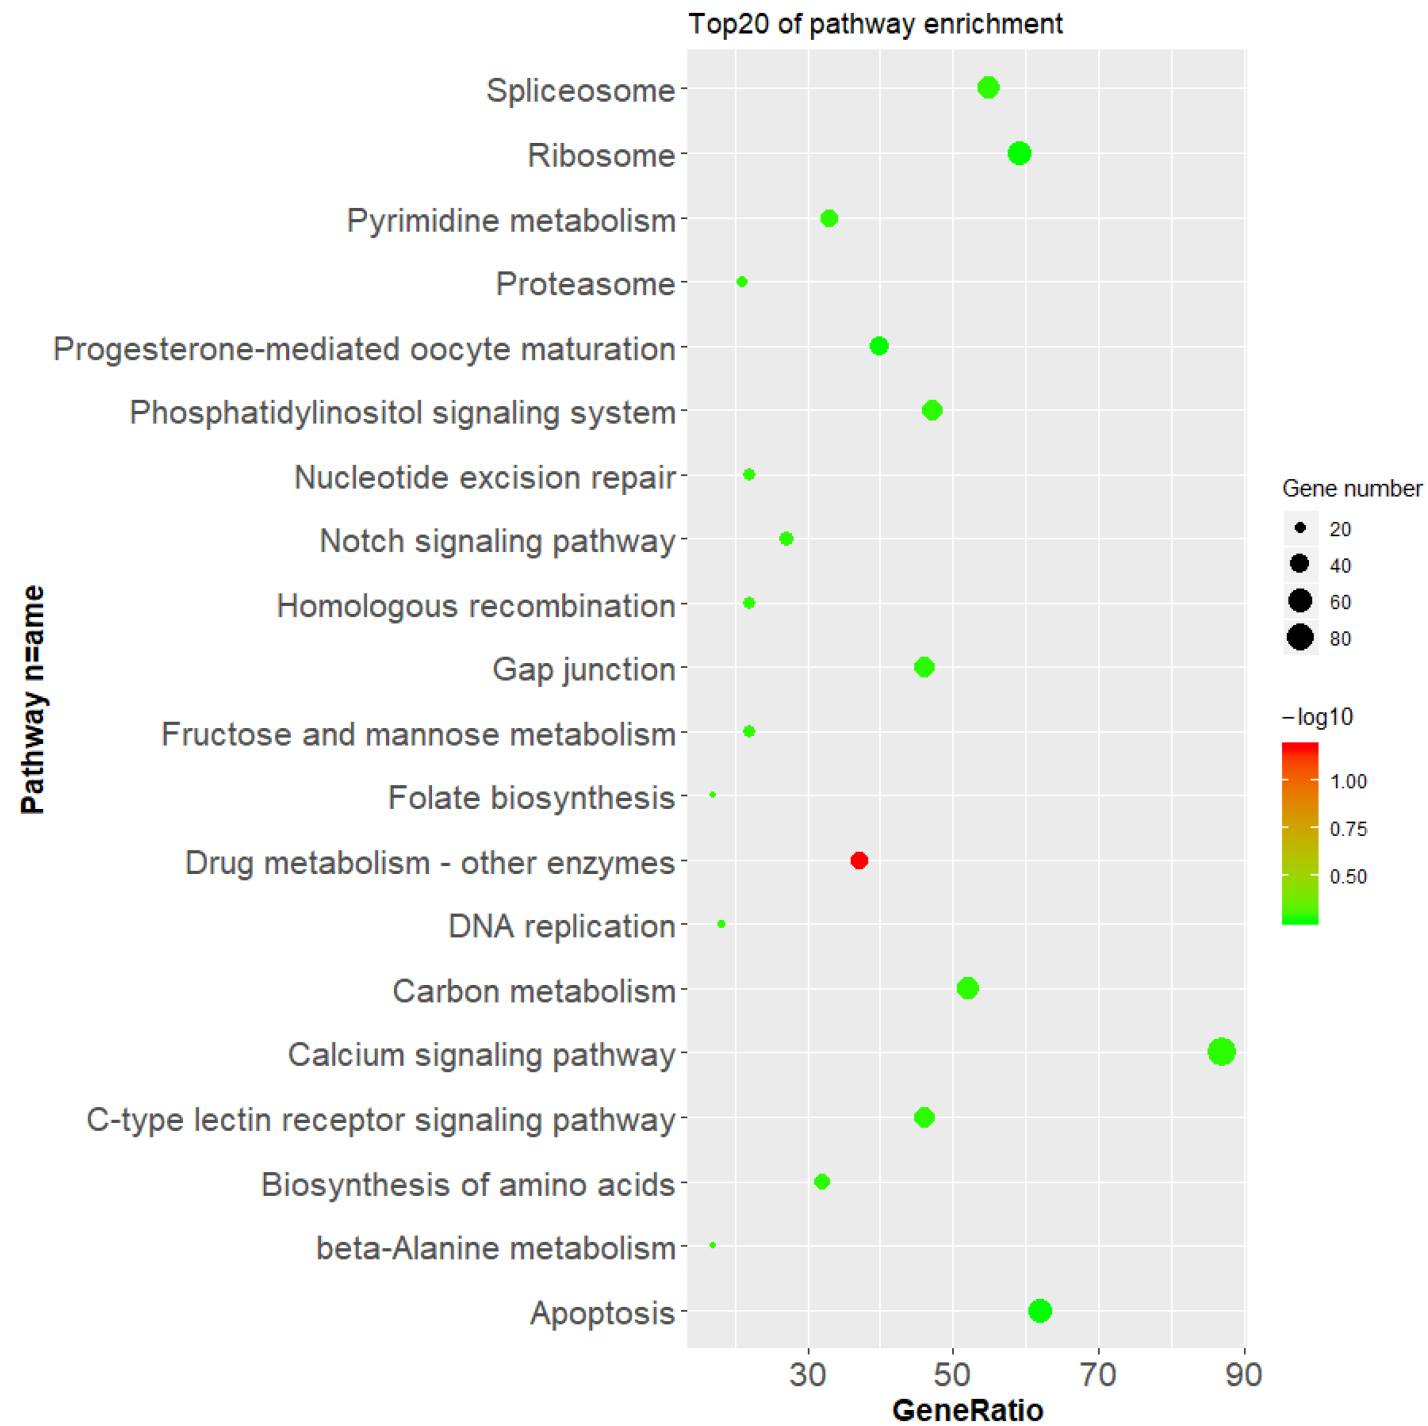

Supplement: 12711_2023_866_MOESM13_ESM.pdf [file 12711_2023_866_MOESM13_ESM.pdf]
